# Supplementary material
Source: PubMed Central journal article supplement (PMC4150134)
Supplement: supp_WNL.0000000000000709_Figure_e-1.pdf [file supp_WNL.0000000000000709_Figure_e-1.pdf]

1 **Supplementary Figure e-1:**

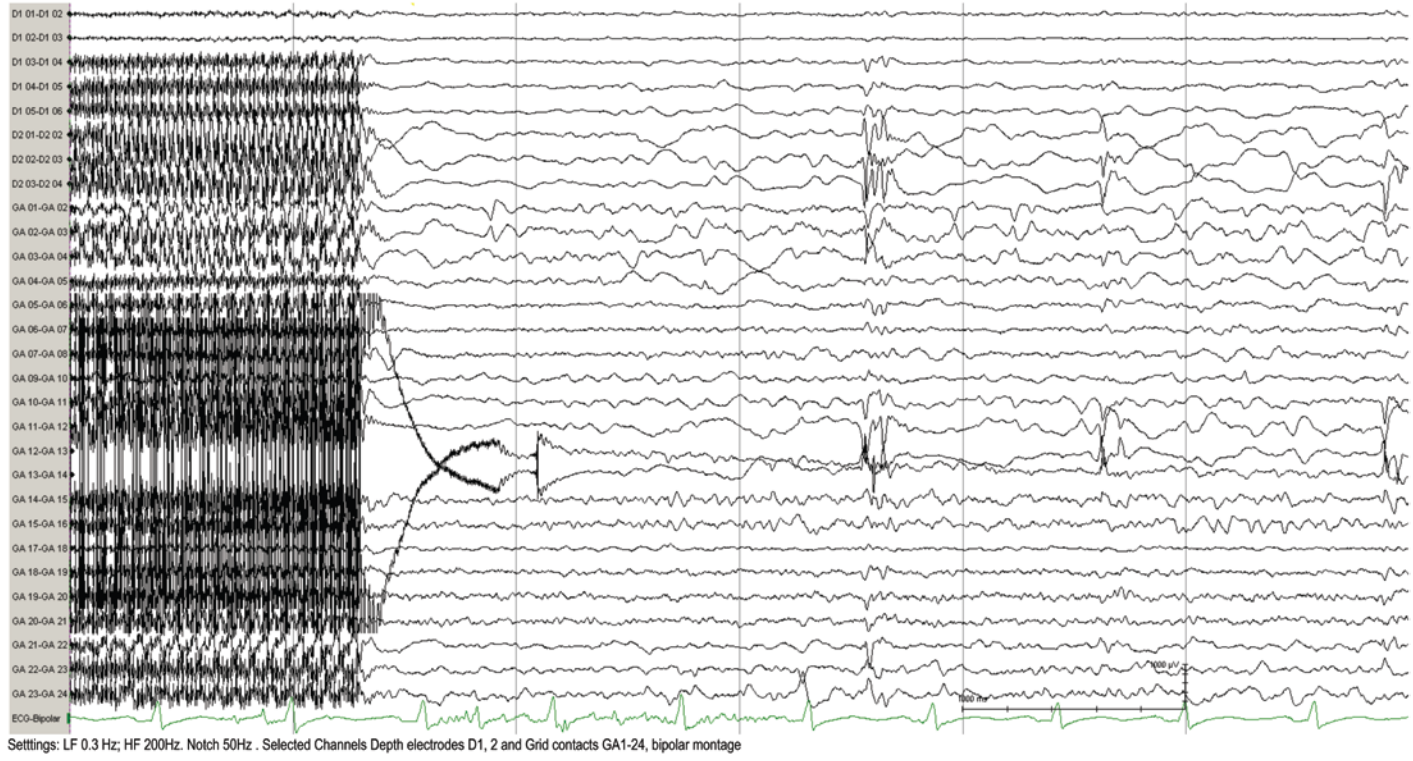

2

3 **Intracranial EEG during bipolar electro-cortical stimulation of contact GA 13 (against**  
4 **distant electrode GA 53) evoked kinetopsia time locked to the electrical stimulus; following**  
5 **stimulation habitual inter-ictal spikes are seen on GA 12, 13 and D2.**

6
